# Supplementary material for: Sociobiome - Individual and neighborhood socioeconomic status influence the gut microbiome in a multi-ethnic population in the US
Source: PubMed Central journal article supplement (PMC10928180; doi:10.1038/s41522-024-00491-y), 2024-03-11
Supplement: 41522_2024_491_MOESM2_ESM.pdf [file 41522_2024_491_MOESM2_ESM.pdf]

## Supplementary Information

**Supplementary Table 1. Characteristics of Study Participants by Race/Ethnicity**

|                                          | NH White (N=311)                 | NH Asian (N=287)                  | NH Black (N=89)                  | Hispanic (N=138)                 |
|------------------------------------------|----------------------------------|-----------------------------------|----------------------------------|----------------------------------|
| <b>Age</b>                               |                                  |                                   |                                  |                                  |
| Mean (SD) [min, max]                     | 57.6 (10.1) [40, 87]             | 64.9 (11.6) [40, 91]              | 54.2 (8.8) [40, 80]              | 56.3 (9.6) [40, 81]              |
| <b>Sex</b>                               |                                  |                                   |                                  |                                  |
| Male                                     | 138 (44.4%)                      | 93 (32.4%)                        | 29 (32.6%)                       | 43 (31.2%)                       |
| Female                                   | 173 (55.6%)                      | 194 (67.6%)                       | 60 (67.4%)                       | 95 (68.8%)                       |
| <b>Nativity</b>                          |                                  |                                   |                                  |                                  |
| U.S.-born                                | 297 (95.5%)                      | 8 (2.8%)                          | 85 (95.5%)                       | 38 (27.5%)                       |
| Foreign-born                             | 14 (4.5%)                        | 279 (97.2%)                       | 4 (4.5%)                         | 100 (72.5%)                      |
| <b>Smoking status</b>                    |                                  |                                   |                                  |                                  |
| Never                                    | 185 (59.5%)                      | 218 (76.0%)                       | 55 (61.8%)                       | 79 (57.2%)                       |
| Former                                   | 101 (32.5%)                      | 47 (16.4%)                        | 22 (24.7%)                       | 32 (23.2%)                       |
| Current                                  | 25 (8.0%)                        | 19 (6.6%)                         | 12 (13.5%)                       | 22 (15.9%)                       |
| Missing                                  | 0 (0%)                           | 3 (1.0%)                          | 0 (0%)                           | 5 (3.6%)                         |
| <b>Exercise</b>                          |                                  |                                   |                                  |                                  |
| None                                     | 30 (9.6%)                        | 41 (14.3%)                        | 7 (7.9%)                         | 34 (24.6%)                       |
| 1 hr/week                                | 66 (21.2%)                       | 61 (21.3%)                        | 31 (34.8%)                       | 38 (27.5%)                       |
| 2–3 hr/week                              | 110 (35.4%)                      | 82 (28.6%)                        | 28 (31.5%)                       | 32 (23.2%)                       |
| 4 hr/week                                | 103 (33.1%)                      | 101 (35.2%)                       | 22 (24.7%)                       | 30 (21.7%)                       |
| Missing                                  | 2 (0.6%)                         | 2 (0.7%)                          | 1 (1.1%)                         | 4 (2.9%)                         |
| <b>Dietary acculturation index</b>       |                                  |                                   |                                  |                                  |
| Mean (SD) [min, max]                     | 0.062 (0.093)<br>[-0.261, 0.292] | -0.089 (0.104)<br>[-0.305, 0.288] | 0.026 (0.095)<br>[-0.253, 0.240] | 0.024 (0.112)<br>[-0.315, 0.238] |
| Missing                                  | 13 (4.2%)                        | 14 (4.9%)                         | 4 (4.5%)                         | 13 (9.4%)                        |
| <b>Body mass index, kg/m<sup>2</sup></b> |                                  |                                   |                                  |                                  |
| Mean (SD) [min, max]                     | 28.4 (6.5)<br>[17.9, 55.0]       | 23.9 (3.4)<br>[15.5, 40.3]        | 31.3 (7.4)<br>[15.8, 55.6]       | 29.7 (6.8)<br>[16.8, 51.0]       |
| Missing                                  | 0 (0.0%)                         | 14 (4.9%)                         | 4 (4.5%)                         | 2 (1.4%)                         |
| <b>Individual-level SES</b>              |                                  |                                   |                                  |                                  |
| <b>Education</b>                         |                                  |                                   |                                  |                                  |
| More than high school graduate           | 294 (94.5%)                      | 186 (64.8%)                       | 81 (91.0%)                       | 53 (38.4%)                       |
| High school graduate or less; Low SES    | 17 (5.5%)                        | 98 (34.1%)                        | 8 (9.0%)                         | 83 (60.1%)                       |
| Missing                                  | 0 (0.0%)                         | 3 (1.0%)                          | 0 (0.0%)                         | 2 (1.4%)                         |
| <b>OSEI</b>                              |                                  |                                   |                                  |                                  |
| Q5 [81.025, 92.782]                      | 85 (27.3%)                       | 30 (10.5%)                        | 10 (11.2%)                       | 7 (5.1%)                         |
| Q4 [62.947, 80.919]                      | 89 (28.6%)                       | 20 (7.0%)                         | 18 (20.2%)                       | 8 (5.8%)                         |
| Q3 [43.859, 62.573]                      | 49 (15.8%)                       | 40 (13.9%)                        | 12 (13.5%)                       | 19 (13.8%)                       |
| Q2 [28.681, 42.994]                      | 54 (17.4%)                       | 69 (24.0%)                        | 25 (28.1%)                       | 20 (14.5%)                       |
| Q1 [12.609, 28.645]; Lowest SES          | 18 (5.8%)                        | 63 (22.0%)                        | 15 (16.9%)                       | 43 (31.2%)                       |
| Missing                                  | 16 (5.1%)                        | 65 (22.6%)                        | 9 (10.1%)                        | 41 (29.7%)                       |
| <b>Neighborhood-level SES</b>            |                                  |                                   |                                  |                                  |
| <b>Income</b>                            |                                  |                                   |                                  |                                  |
| Q5 [86302, 209063]                       | 93 (29.9%)                       | 53 (18.5%)                        | 11 (12.4%)                       | 8 (5.8%)                         |
| Q4 [63446, 85551]                        | 76 (24.4%)                       | 71 (24.7%)                        | 11 (12.4%)                       | 7 (5.1%)                         |
| Q3 [51806, 63036]                        | 66 (21.2%)                       | 63 (22.0%)                        | 17 (19.1%)                       | 19 (13.8%)                       |
| Q2 [36250, 51773]                        | 48 (15.4%)                       | 50 (17.4%)                        | 21 (23.6%)                       | 45 (32.6%)                       |
| Q1 [11809, 36236]; Lowest SES            | 28 (9.0%)                        | 50 (17.4%)                        | 29 (32.6%)                       | 59 (42.8%)                       |
| <b>SDI score</b>                         |                                  |                                   |                                  |                                  |
| Q5 [1, 21]                               | 126 (40.5%)                      | 26 (9.1%)                         | 8 (9.0%)                         | 5 (3.6%)                         |
| Q4 [22, 48]                              | 93 (29.9%)                       | 62 (21.6%)                        | 13 (14.6%)                       | 2 (1.4%)                         |
| Q3 [49, 74]                              | 53 (17.0%)                       | 69 (24.0%)                        | 25 (28.1%)                       | 13 (9.4%)                        |
| Q2 [75, 91]                              | 25 (8.0%)                        | 112 (39.0%)                       | 15 (16.9%)                       | 33 (23.9%)                       |
| Q1 [92,100]; Lowest SES                  | 14 (4.5%)                        | 18 (6.3%)                         | 28 (31.5%)                       | 85 (61.6%)                       |

Values are presented as the mean (SD) for continuous variables and as the number of counts and percentages for categorical variables, the range is in the brackets. Income variable was derived using median household income (dollars) in the past 12 months (B19013\_001) in the census tract obtained from American Census Survey 2011–2015. NH: Non-Hispanic, OSEI: Occupational Socioeconomic Index, SDI: Social Deprivation Index

### Shannon Rarefaction Analysis

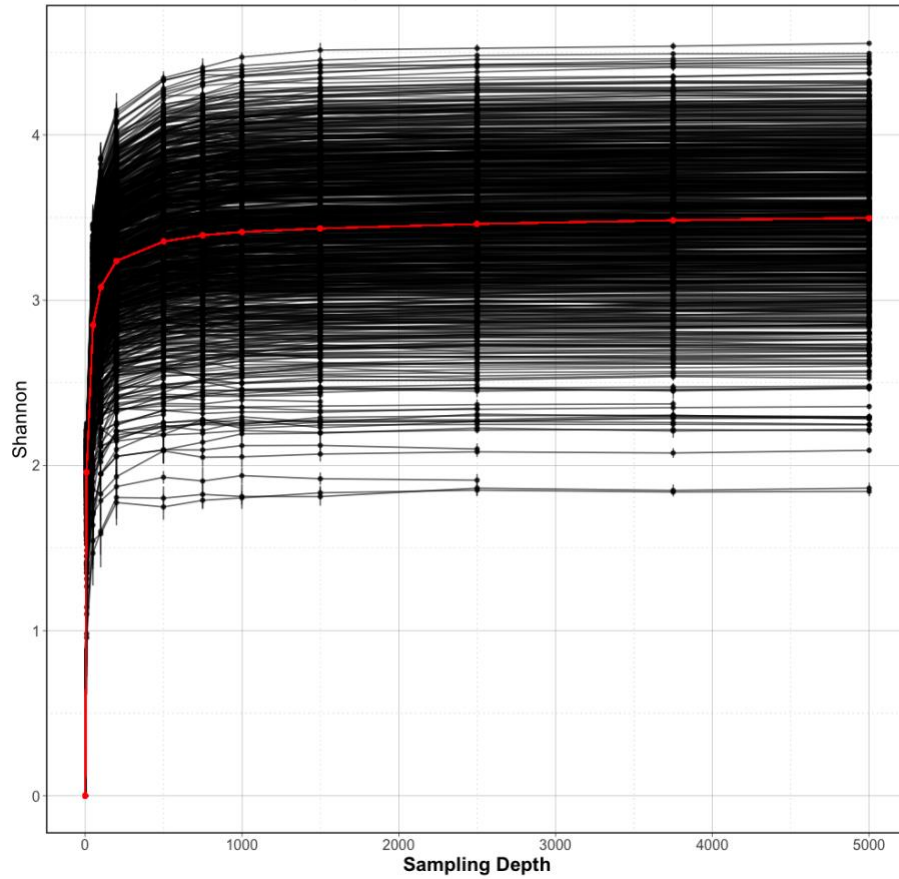

#### Supplementary Figure 1. Rarefaction curves of the Shannon index

The Shannon diversity index were calculated in 100 iterations at different rarefied sequencing depths (from 1 to 5000 sequence reads per sample), and averaged for each subject at each sequencing depth. Each subject is represented by a black line, while the red line represents the average values for all subjects. At the rarefaction depth of 1000 sequences per sample, 23 out of 825 samples (2.8%) were excluded for diversity analysis.

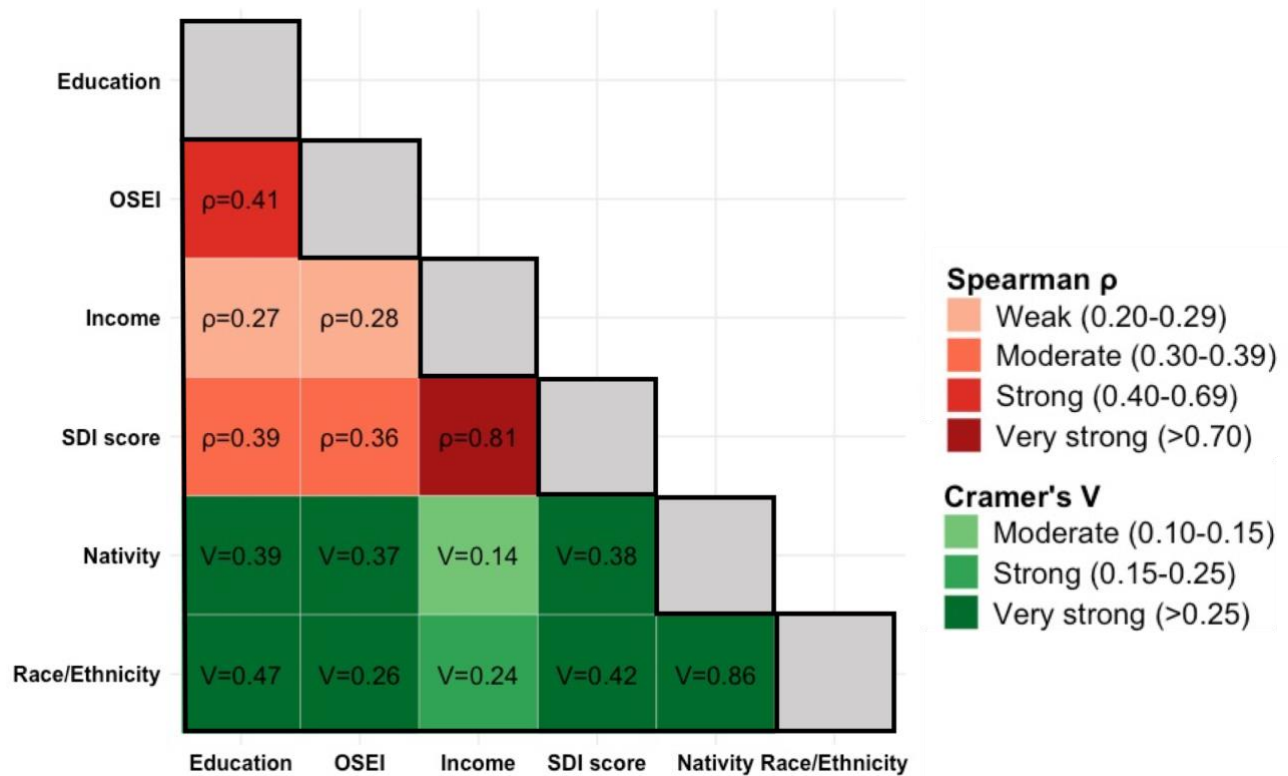

**Supplementary Figure 2. Correlation between Socioeconomic Status, Nativity, and Race/Ethnicity**

The heatmap provides a visualization of the correlation structure among the variables, employing Spearman correlation for ordinal variables and Cramer's V for nominal variables, respectively. The color intensity reflects the magnitude of the correlation effect size. Data are from the full sample (N=825) of the FAMiLI study. OSEI: Occupational Socioeconomic Index, SDI: Social Deprivation Index
